# Supplementary material
Source: PubMed Central journal article supplement (PMC6611463)
Supplement: NIHMS879139-supplement-2.pdf [file NIHMS879139-supplement-2.pdf]

Supplemental Information for  
**Catch-and-release of cytokines mediated by tumor phosphatidylserine  
converts transient exposure into long-lived inflammation.**  
by Oyler-Yaniv et al.

May 3, 2017

# Contents

|          |                                     |           |
|----------|-------------------------------------|-----------|
| <b>1</b> | <b>Supplemental Figures</b>         | <b>2</b>  |
| <b>2</b> | <b>Confocal microscopy analysis</b> | <b>10</b> |

# 1 Supplemental Figures

Figure S1: Related to Figure 1. Transient IFN $\gamma$  drives persistent T cell activation caused by up-regulation of antigen processing and presentation. (A) The k-means algorithm was applied to our RNAseq data (Figure 1E) for increasing number of clusters (n=1-50). The sum of distance represents the total Euclidean distance between cluster centroid and the data. (B) B16 cells were pulsed with IFN $\gamma$ , washed, and cultured in fresh media. At indicated time-points, cells were harvested and MHC-I (H2-D<sup>b</sup> and H2-K<sup>b</sup>) were quantified by flow cytometry. Alternatively, at each time-point, RNA was harvested, purified, and *h2db* and *h2kb* transcripts were quantified by RT-qPCR. For both mRNA and protein, data are representative of at least 3 independent experiments.

Figure S2: Related to Figure 2. Jak-STAT signaling drives persistent transcription. (A) B16 cells were exposed to IFN $\gamma$  for 20 minutes, then JAKi was added. Cells were harvested at indicated time-points, fixed and permeabilized, and stained for pSTAT1. pSTAT1 was quantified by flow cytometry and the resultant time kinetics were fitted with a double exponential decay function to highlight the rapid dephosphorylation of pSTAT1 ( $\tau < 10$ min). Data plotted is representative of 3 independent experiments. (B) B16 cells were stimulated with IFN $\gamma$  for 5h, washed, then cultured in fresh media. At the time of wash, one cohort of cells received neutralizing antibodies directed against both the common receptor for IFN $\alpha\beta$  and the cytokine IFN $\beta$ . The other cohort received IgG control antibodies. MHC-I (H2-K<sup>b</sup>) was quantified by flow cytometry. Data plotted is representative of 3 independent experiments. (C) B16 cells were pulsed for 5h with IFN $\gamma$  then washed. Immediately after the last wash, conditioned media was harvested. A fresh cohort of B16 cells were cultured in either conditioned media, 10nM IFN $\gamma$  or media alone for 1 day. MHC-I (H2-K<sup>b</sup>) was quantified by flow cytometry.

Figure S3: Related to Figure 3. Cytokine-pulsed cells slowly release IFN $\gamma$ . (A) One group of B16 cells was pulsed with IFN $\gamma$  for 5h, then washed. Pulsed cells were then co-cultured in the bottom of a transwell with fluorescent-labeled unstimulated sensor cells. An additional group of sensor cells were cultured on top of the transwell insert. Neutralizing antibodies against IFN $\gamma$  were added where indicated as controls. MHC-I (H2-K<sup>b</sup>) was measured at indicated time-points. (B) T cell-derived IFN $\gamma$  was harvested from the supernatant of PMA/Ionomycin activated C57Bl/6 IFN $\gamma$ R KO splenocytes. B16 IFN $\gamma$ R KO cells were pulsed with the indicated concentration of either T cell-derived or recombinant IFN $\gamma$  in a well-mixed setting for 5 hours. Culture media was then harvested from cells and a bead-based ELISA was used to quantify the depletion of IFN $\gamma$  from the media. (C) For cartoon, see Figure 5G. B16 IFN $\gamma$ R KO cells were incubated with the glycolipid inhibiting drugs Fumonisin B, PDMP, or DMSO as a vehicle control for 3 days before performing the IFN $\gamma$  cell-capture assay. Treated cells were cultured with 50pM IFN $\gamma$  for 5 hours, then the culture supernatant was harvested and depletion of IFN $\gamma$  from the media was quantified by bead-based ELISA. Alternatively, cells were incubated with dynasore, or treated with the enzymes heparinase I (hepI), heparinase III (hepIII), chondroitin ABC lyase (chABC), or pronase prior to performing the IFN $\gamma$  cell-capture assay. All plots are representative of at least 2 independent experiments. In the case of enzymatic treatments (hepI, hepIII, chABC, and pronase), cells were incubated for only 2 hours before harvesting culture supernatant. (D) B16 IFN $\gamma$ R KO cells were pulsed with IFN $\gamma$ -A647 while tumbling in RPMI, then washed (black). To pre-treat cells with unlabeled IFN $\gamma$ , cells were pulsed with unlabeled, recombinant IFN $\gamma$ , then an equimolar concentration of IFN $\gamma$ -A647 was spiked in and incubated for an equivalent amount of time. Cells were then washed (cyan). To check whether dye particles left in the protein prep could bind cells non-specifically, we prepared a protein-free sample of Alexa647 dye treated exactly as the IFN $\gamma$ -A647 was treated and exposed an equal quantity to cells before washing. Cell fluorescence was quantified by flow cytometry. Data is representative of 2 independent experiments. (E) B16 IFN $\gamma$ R KO cells were pulsed with 10nM either IFN $\gamma$ -A488 or unlabeled IFN $\gamma$  for 5 hours, then washed and co-cultured with CTV-labeled B16 IFN $\gamma$ R competent B16 cells. To relevant wells,  $\alpha$ IFN $\gamma$  was added. MHC-I (H2-K<sup>b</sup>) was measured by flow cytometry after 1 day of co-culture. (F) B16 IFN $\gamma$ R KO cells were adhered to glass bottom dishes, incubated with IFN $\gamma$ -A647, washed, and imaged with confocal microscopy. Image is representative of at least 3 independent experiments.

Figure S4: Related to Figure 4. A mathematical model, including a slow catch and release process, recapitulates experimental results. (A) B16 cells were stimulated with different doses of IFN $\gamma$  for 20 minutes. Cells were fixed, permeabilized, and stained for pSTAT1. Fluorescence was quantified by flow cytometry and the resultant curve was fitted with a Hill function with a coefficient of 1. Data is representative of at least 3 independent experiments. (B) B16 cells were exposed to a constant, saturating dose of IFN $\gamma$ . RNA was harvested periodically and the kinetics of *h2kb* transcript accumulation were quantified by RT-qPCR. The data are representative of at least 3 independent experiments. (C) The transcription kinetics in B were converted into the transcription rate using and the adaptation timescale was computed from the fit. (D) The model generates a concentration of free IFN $\gamma$  that decreases depending on consumption. The pSTAT1 profile is generated from the free IFN $\gamma$  concentration and the experimentally-determined EC<sub>50</sub> of signaling. (E) The model was run by simulating the kinetics of mRNA for cells pulsed for 5h with 10nM IFN $\gamma$ , then washed. The model was setup to capture and release IFN $\gamma$  based on the rates acquired from our catch-and-release mechanism, published rates for IL10 binding to heparan sulfate  $\gamma$ , or with no capture and release. (F) B16 cells were stimulated with a constant dose of 1nM IFN $\gamma$  or media alone. At the indicated time-points, cells were fixed, permeabilized, and stained for pSTAT1. Fluorescence was quantified by flow cytometry. (G) The model was run by calculating the H2-K<sup>b</sup> protein that accumulates based on the concentration of free IFN $\gamma$  generated by the model and the experimentally-determined EC<sub>50</sub> of signaling. Sharing cells were simulated by assuming that they were exposed to 10nM IFN $\gamma$  for 5 hours prior to removal of the exogenous signal. Sensor cells were simulated by assuming that their first exposure to IFN $\gamma$  was after removal of exogenous IFN $\gamma$  (i.e. they were only exposed to the free IFN $\gamma$  originating from sharing cells). (H) This plot shows some data originally plotted in Figure S3A, with one additional condition not shown in that graph. One group of B16 cells was pulsed with IFN $\gamma$  for 5h, then washed. Pulsed cells were then co-cultured in the bottom of a transwell with fluorescent-labeled unstimulated sensor cells. MHC-I (H2-K<sup>b</sup>) was quantified on both IFN $\gamma$ -pulsed cells (sharing cells), and mixed sensor cells at the indicated timepoints.

Figure S5: Related to Figure 5. Phosphatidylserine is necessary for IFN $\gamma$  cell binding. (A-B) B16 IFN $\gamma$ R KO cells were either stained live, or fixed and permeabilized then stained for cardiolipin (A) or PI(4)P (B). As a negative control, cells were stained with the secondary antibody only. Fluorescence was quantified with flow cytometry. (C) B16 IFN $\gamma$ R KO cells were stained with Annexin V. Dead cells were identified as rounded, detached from the glass surface, and stained brightly in a uniform pattern on the plasma membrane. (D) All of the indicated cell lines were stained with Annexin V. Cells of interest were gated as DAPI-. (E) All of the indicated mouse cell lines were stained live or fixed and permeabilized then stained with MFG-E8 and antibodies directed against MFG-E8. As a negative control, MFG-E8 was omitted and some cells were stained with only with the biotinylated secondary antibody and fluorescent streptavidin. Cells of interest were gated as DAPI-. (F) B16 IFN $\gamma$ R KO cells were incubated with either MFG-E8 or Annexin V to block PS, then the IFN $\gamma$  cell capture assay was performed.

Figure S6: Related to Figure 5. Cytokine catch-and-release could enable communication between spatio- temporally separate cells and is also observed for IL23. (A) **CL**: cardiolipin, **PG**: phosphatidylglycerol, **PC**: phosphatidylcholine, **PE**: phosphatidylethanolamine, **PS**: phosphatidylserine, **PA**: phosphatidic acid, **DAG**: diacylglycerol, **TG**: triglyceride, **ST**: sulfatide, **SM**: sphingomyelin, **Ch**: cholesterol, **PI(3,4,5)P<sub>3</sub>**: phosphatidylinositol (3,4,5) triphosphate, **PI(4,5)P<sub>2</sub>**: phosphatidylinositol (4,5) biphosphate, **PI(4)P**: phosphatidylinositol (4) phosphate, **PI**: phosphatidylinositol (B) Naive or activated C57Bl/6 IFN $\gamma$ R KO splenocytes were stained with fluorescent-labeled Annexin V and antibodies directed against B220, CD4 and CD8. Live cells were identified as DAPI-. (C) The tissues noted were isolated from C57Bl/6 IFN $\gamma$ R KO mice and homogenized into a single cell suspension. The IFN $\gamma$  cell capture assay was then performed. B16 IFN $\gamma$ R KO cells were used as a positive control. N.D. stands for not detected. (D) T cells were isolated from a C57Bl/6 IFN $\gamma$ R KO mouse and activated, or maintained naive in culture in IL7. The IFN $\gamma$  cell capture assay was performed after 2 days of activation. B16 IFN $\gamma$ R KO cells were used as a positive control. (E) RNA was purified from thyroid tumors, naive T cells, activated T cells, and activated T cells incubated with drug inhibitors. RT-qPCR was performed on each sample for *Iffng* and *Gapdh* mRNA. The quantity of *Iffng* transcripts was computed using the  $\Delta\Delta C_T$  method. All samples were normalized to the negative control - naive T cells. (F) Splenocytes were isolated and homogenized from B10.A mice and activated for 48h. T cells were then cultured with a combination of inhibitors for 1h before performing a cytokine secretion assay to detect IFN $\gamma$  secretion.

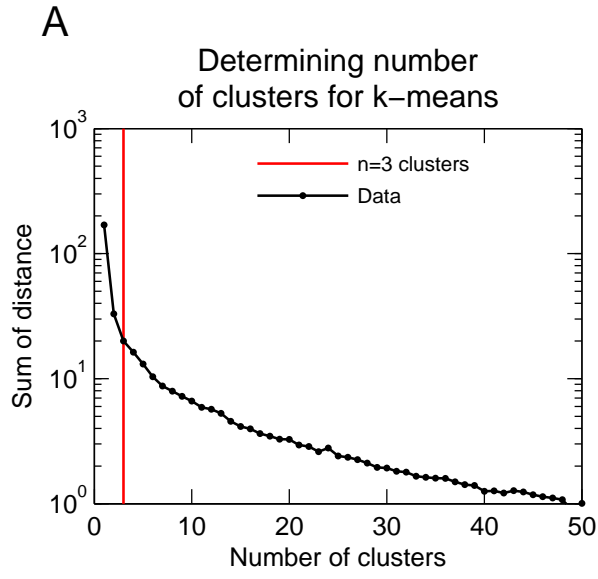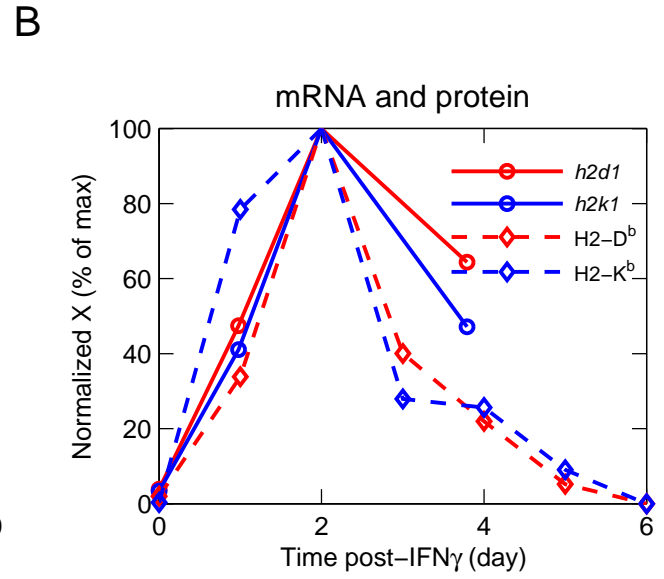

A

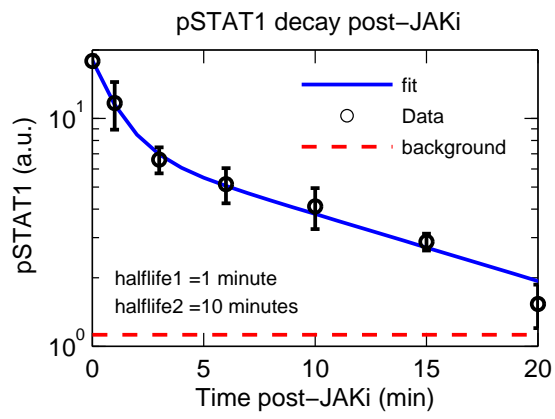

B

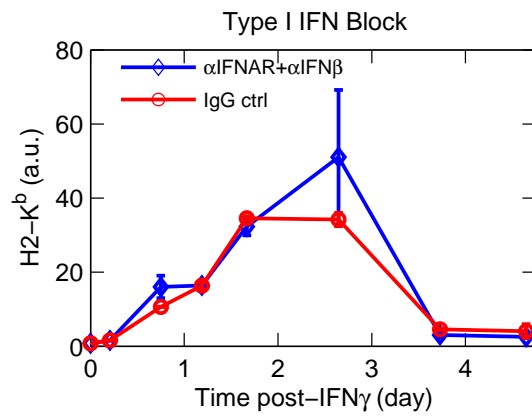

C

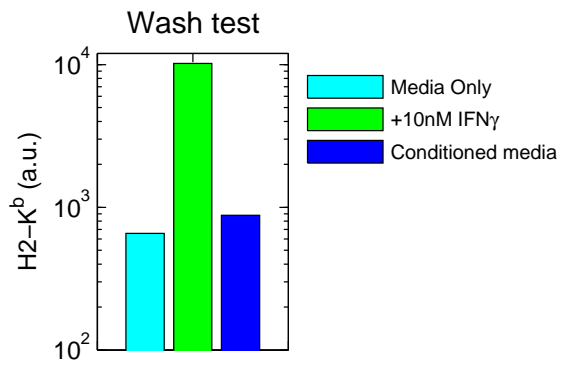

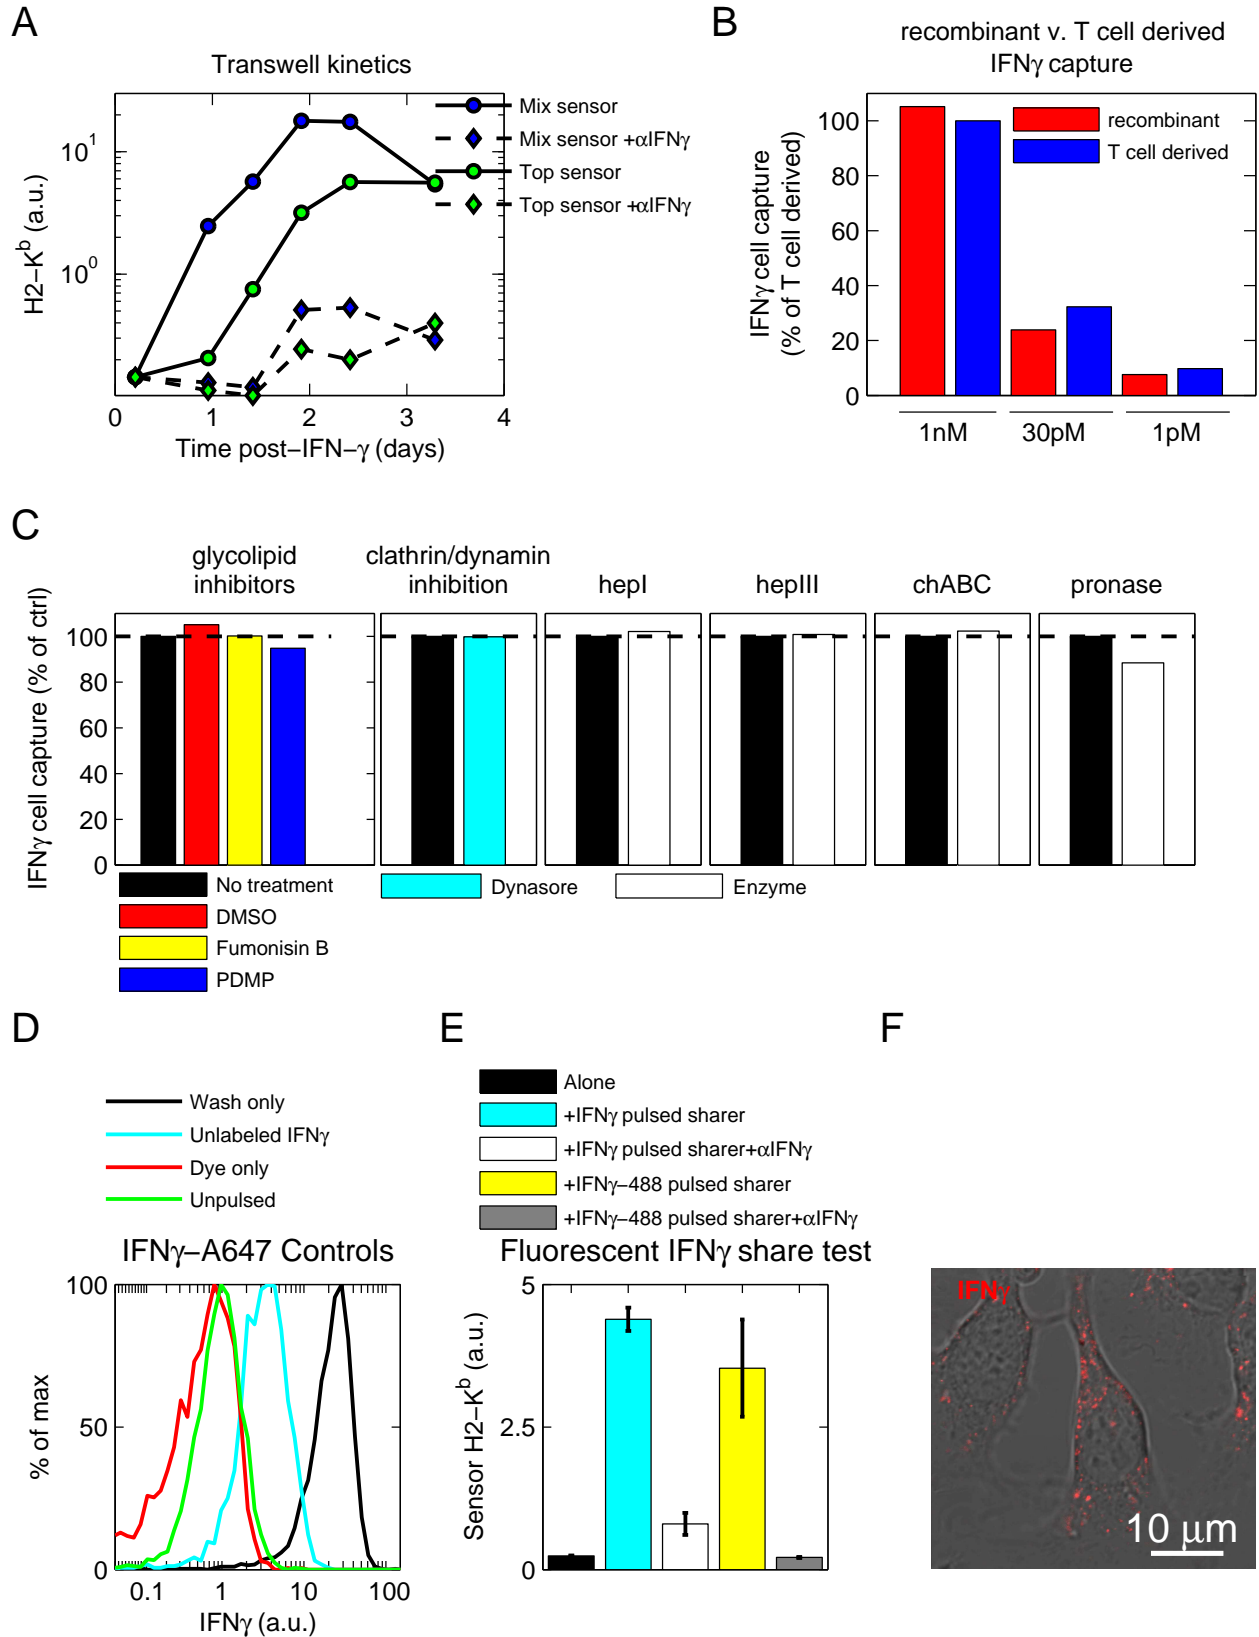

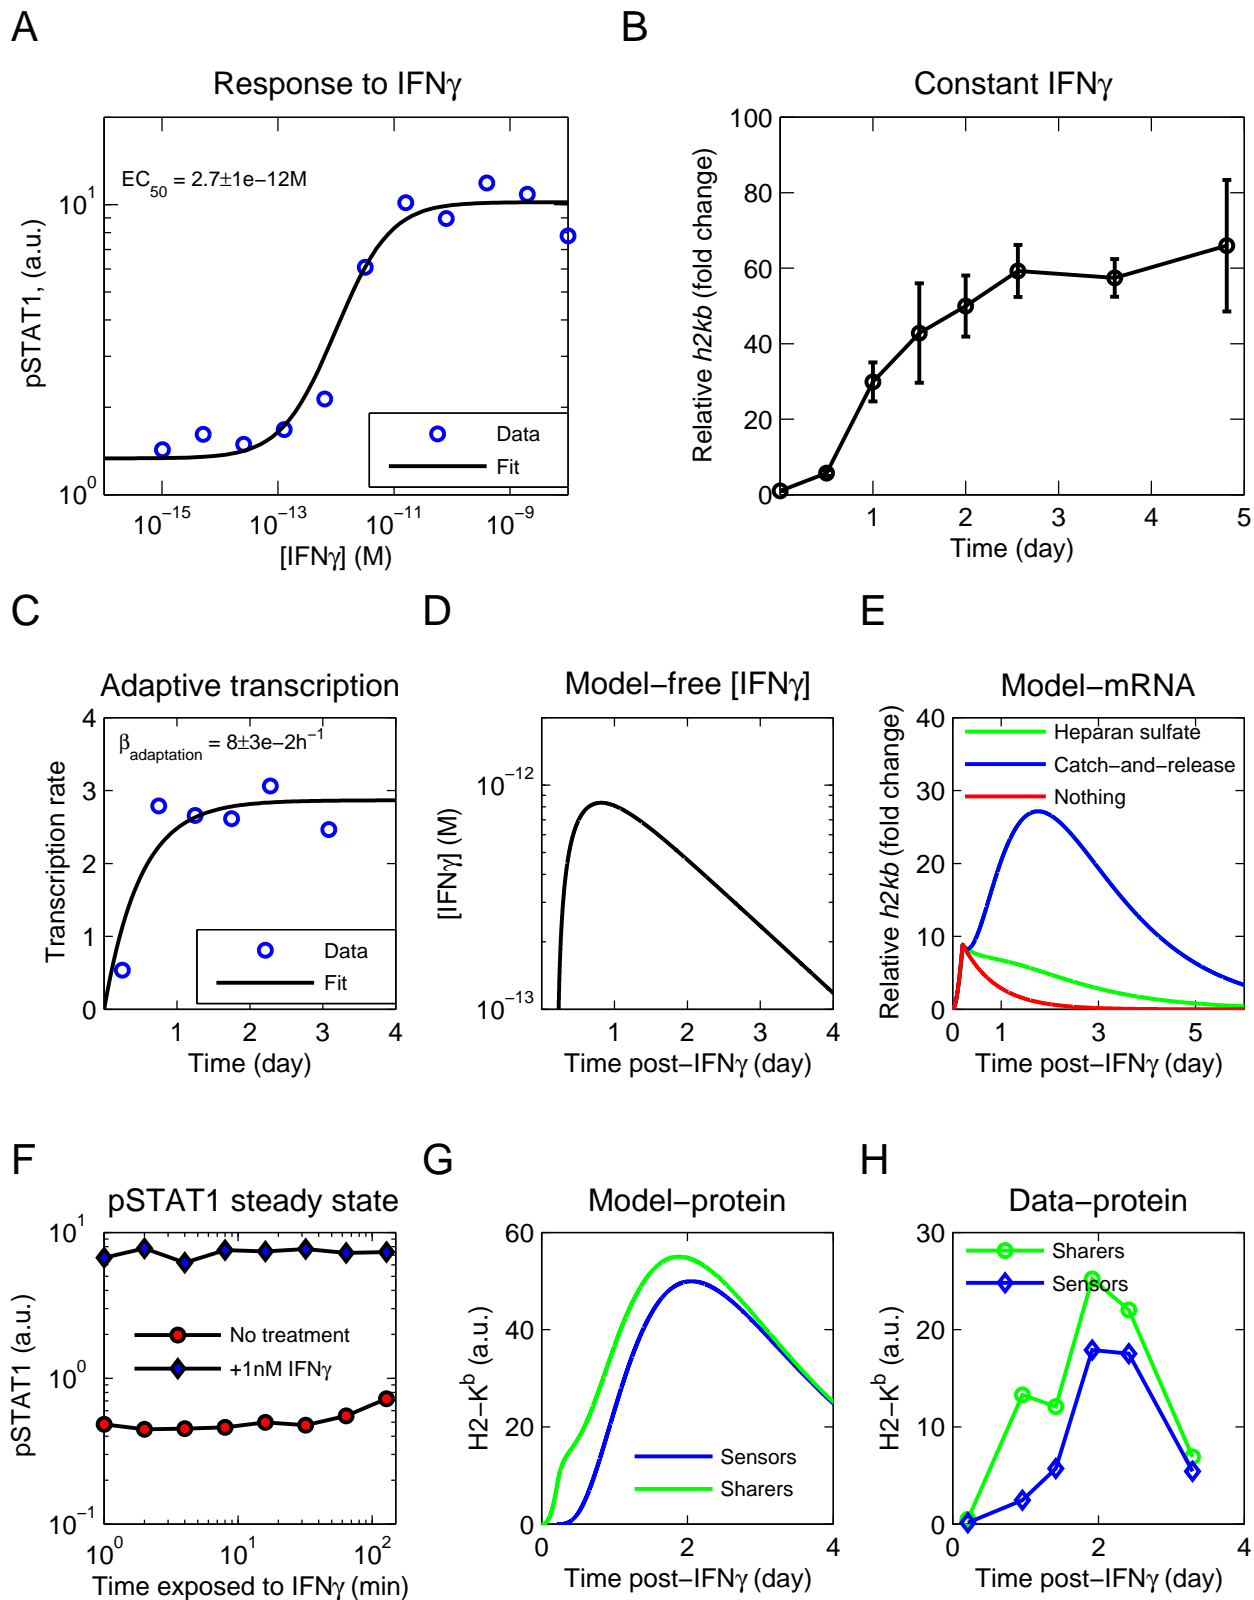



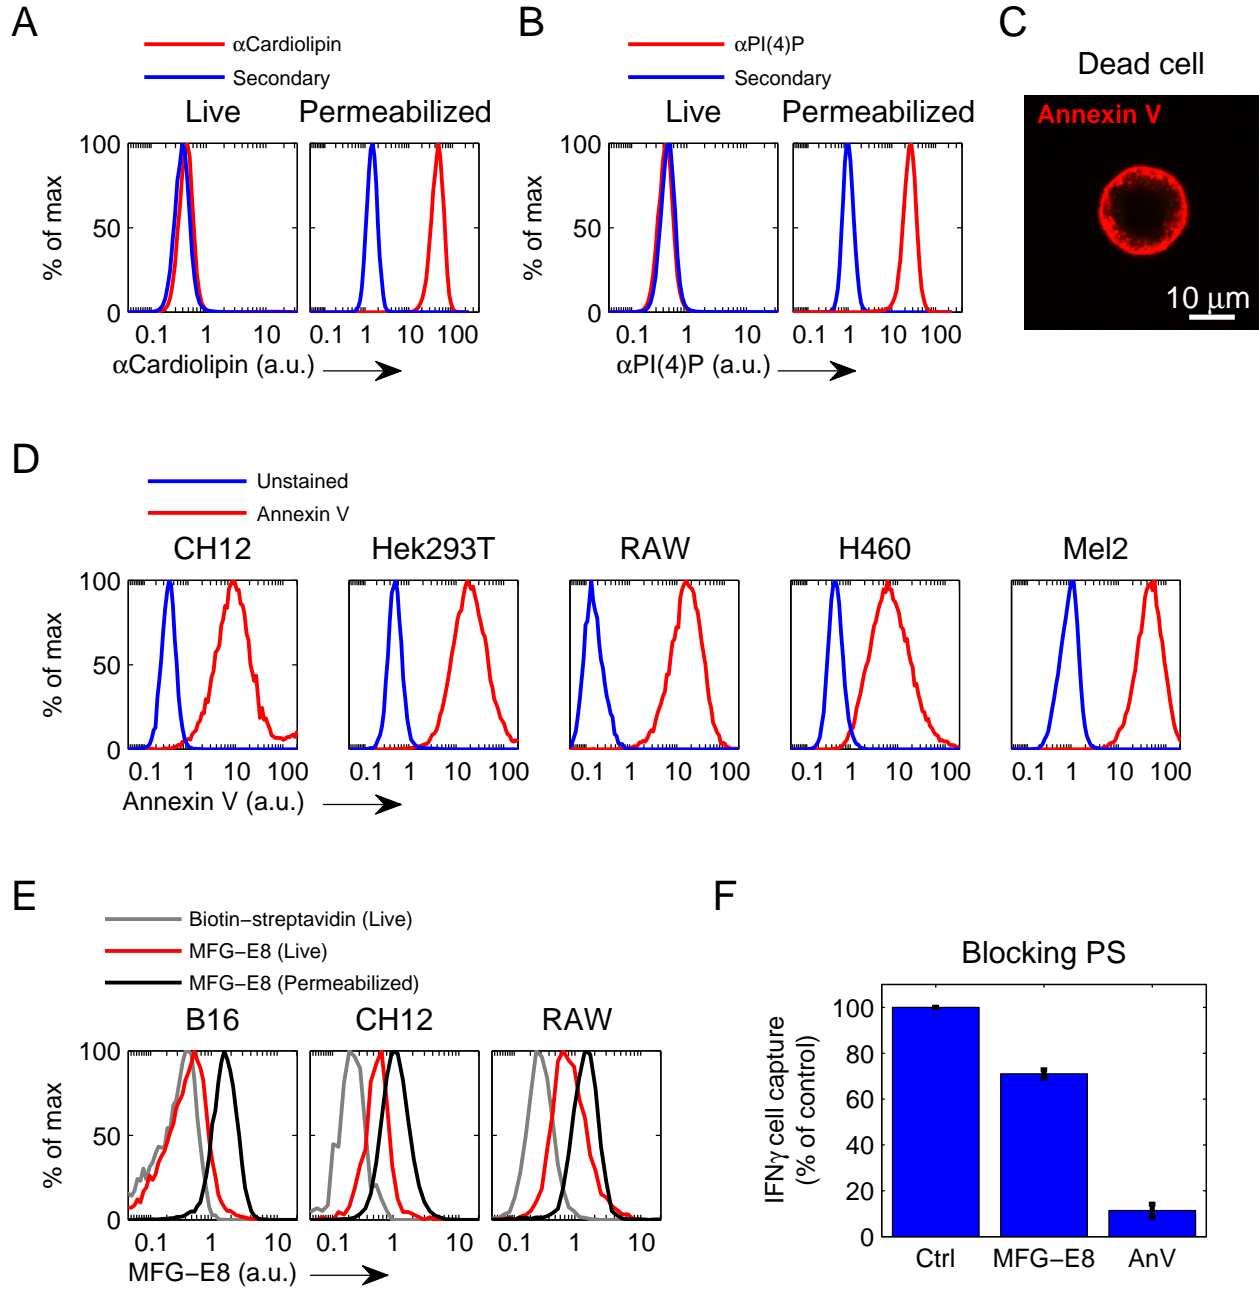

**A**

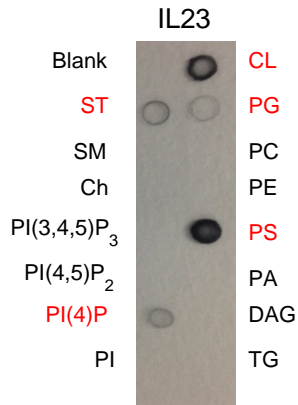

**B**

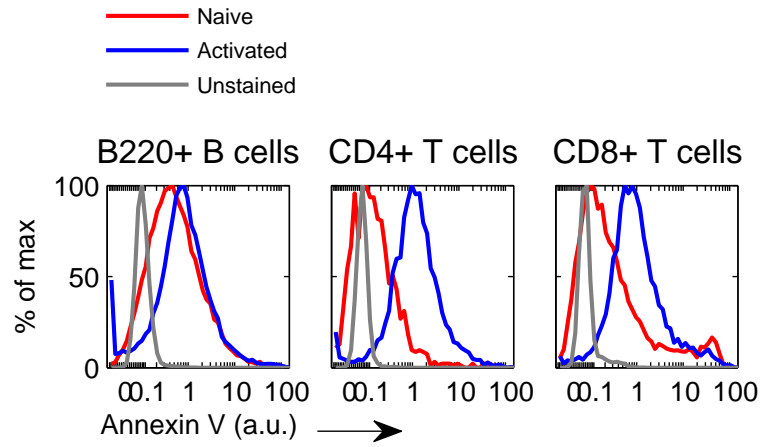

**C**

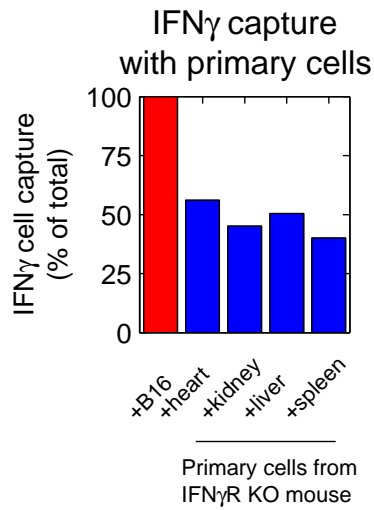

**D**

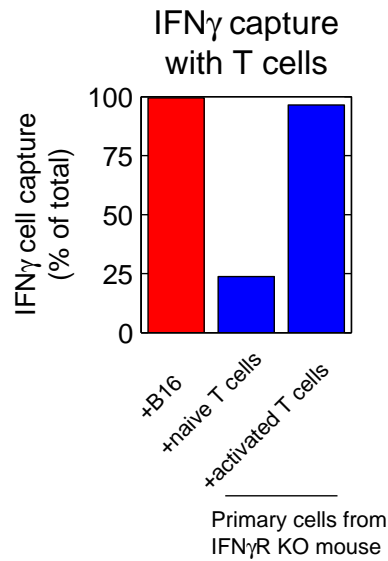

**E**

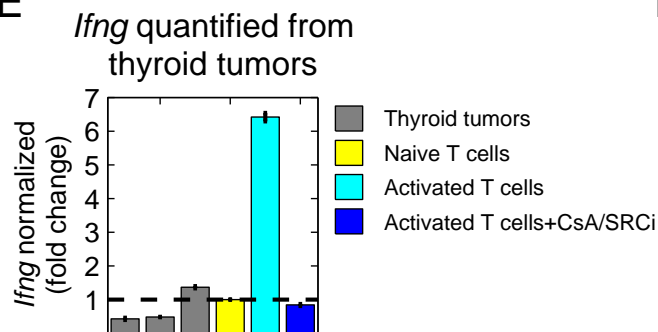

**F**

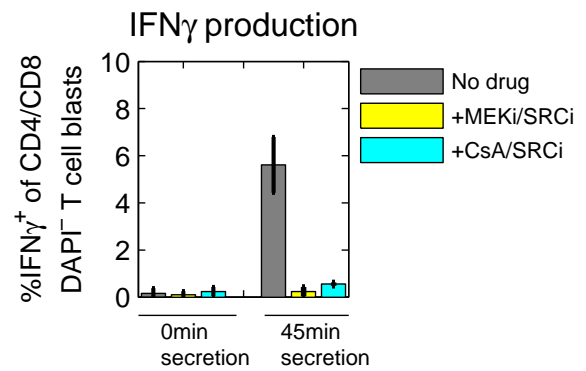

---

## 2 Confocal microscopy analysis

| Image type                             | # independent experiments | # cells analyzed |
|----------------------------------------|---------------------------|------------------|
| Fluorescent IFN $\gamma$ alone         | 4                         | 87               |
| Annexin V alone                        | 3                         | 57               |
| Fluorescent IFN $\gamma$ and Annexin V | 2                         | 66               |
| Membrane stain and IFN $\gamma$        | 3                         | 63               |
| BODIPY-cholesterol and IFN $\gamma$    | 4                         | 132              |

Table S1: Image analysis quantification - Related to Figure 5
